# Supplementary material for: Development and in vitro evaluation of ursolic acid-loaded poly(lactic-co-glycolic acid) nanoparticles in cholangiocarcinoma
Source: Royal Society of Chemistry journal article supplement (doi:10.1039/d4ra03637a), 2024-01-01
Supplement: d4ra03637a1.pdf [file d4ra03637a1.pdf]

## Supporting Information

for

### Development and *In Vitro* Evaluation of Ursolic Acid-Loaded Poly(lactic-co-glycolic acid) Nanoparticles in Cholangiocarcinoma

Pornpattra Maphanao,<sup>a,b</sup> Yaowaret Phothikul,<sup>a</sup> Cherdpong Choodet,<sup>c</sup> Theerapong Puangmali,<sup>c</sup> Kanlaya Katewongsa,<sup>d</sup> Somchai Pinlaor,<sup>b,e</sup> Raynoo Thanan,<sup>a,b</sup> Umaporn Yordpratum<sup>f</sup> and Chadamas Sakonsinsiri<sup>a,b,\*</sup>

<sup>a</sup> Department of Biochemistry, Faculty of Medicine, Khon Kaen University, Khon Kaen 40002, Thailand;

<sup>b</sup> Cholangiocarcinoma Research Institute, Khon Kaen University, Khon Kaen 40002, Thailand;

<sup>c</sup> Department of Physics, Faculty of Science, Khon Kaen University, Khon Kaen 40002, Thailand;

<sup>d</sup> Department of Biochemistry, Faculty of Science, Mahidol University, Bangkok 10400, Thailand;

<sup>e</sup> Department of Parasitology, Faculty of Medicine, Khon Kaen University, Khon Kaen 40002, Thailand;

<sup>f</sup> Department of Microbiology, Faculty of Medicine, Khon Kaen University, Khon Kaen 40002, Thailand

\* Corresponding author: Chadamas Sakonsinsiri; E-mail: schadamas@kku.ac.th

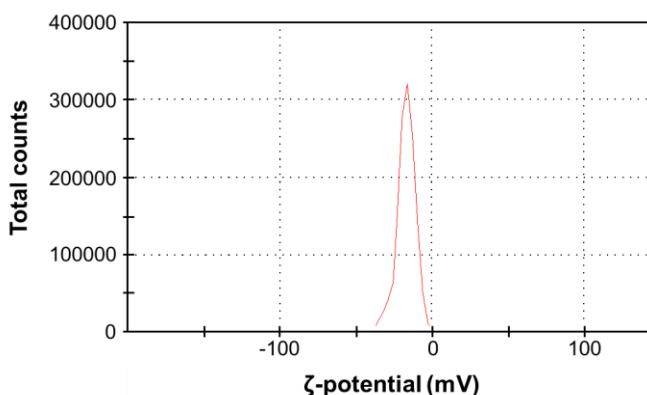

**Fig. S1** The  $\zeta$ -potential distribution of UA-PLGA NPs.

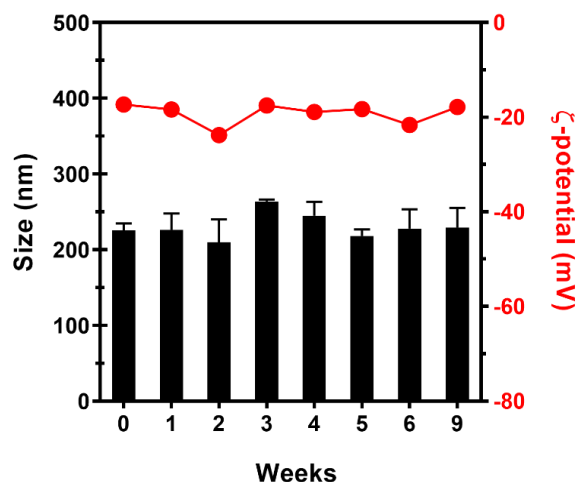

**Fig. S2** Evaluation of hydrodynamic diameter (Dh) and  $\zeta$ -potential stability of UA-PLGA NPs stored at 4 °C in DI water over a duration of 9 weeks.

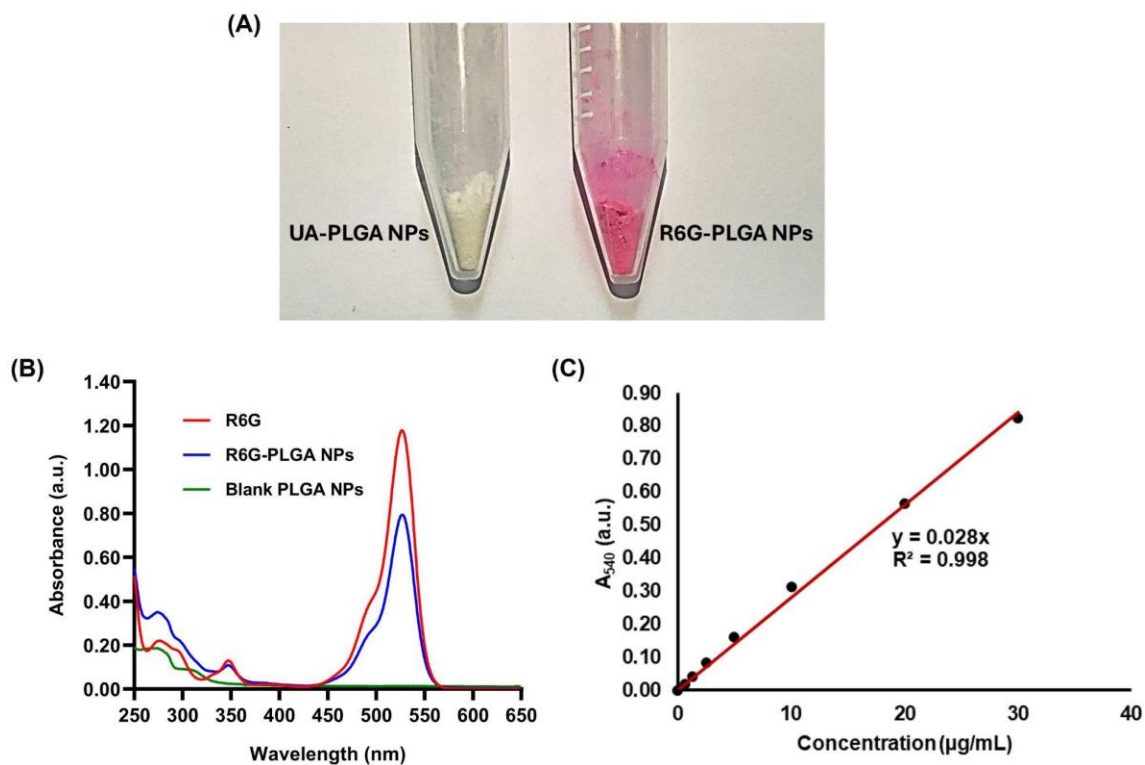

**Fig. S3** Characterization of R6G-PLGA NPs. (A) Photographs of freeze-dried UA-PLGA NPs and R6G-PLGA NPs; (B) Absorption spectra of R6G-PLGA NPs, free R6G and blank PLGA NPs; (C) A standard curve of R6G was used to determine R6G content in the R6G-PLGA NPs.

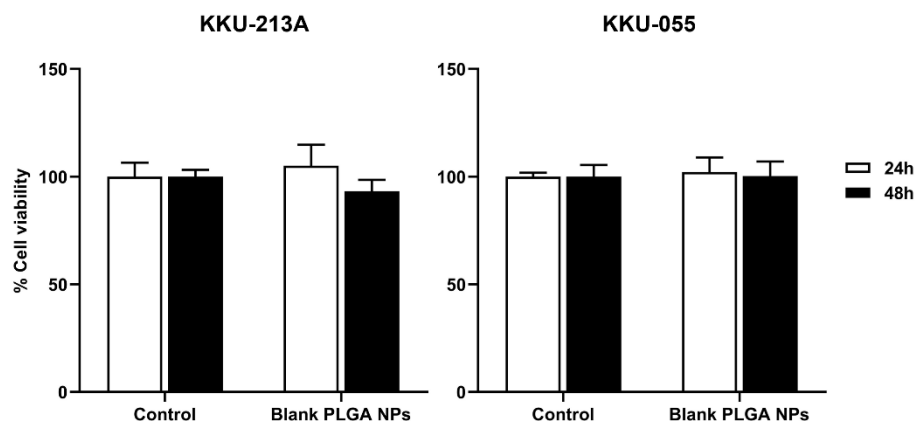

**Fig. S4** Assessment of biocompatibility of blank PLGA NPs at the concentration of 1 mg/mL in KKU-213A and KKU-055 CCA cells at 24 and 48 h.

**Table S1** UA content in UA-PLGA NPs determined by HPLC using a standard curve.

| UA-PLGA NPs ( $\mu\text{g/mL}$ ) | UA in UA-PLGA NPs ( $\mu\text{g/mL}$ ) |
|----------------------------------|----------------------------------------|
| 0                                | 0                                      |
| 100                              | 11                                     |
| 500                              | 56                                     |
| 1000                             | 111                                    |
| 2000                             | 223                                    |

**Table S2**  $\text{IC}_{50}$  values of free UA, UA-PLGA NPs, and encapsulated UA.

| $\text{IC}_{50}$ ( $\mu\text{g/mL}$ ) | Free UA |      | UA-PLGA NPs |       | UA in UA-PLGA NPs |      |
|---------------------------------------|---------|------|-------------|-------|-------------------|------|
|                                       | 24h     | 48h  | 24h         | 48h   | 24h               | 48h  |
| <b>KKU-213A</b>                       | 12.7    | 8.4  | 786.0       | 737.4 | 87.6              | 82.2 |
| <b>KKU-055</b>                        | 10.4    | 10.0 | 587.0       | 539.7 | 65.4              | 60.1 |

NOTE:  $\text{IC}_{50}$ ; The half-maximal inhibitory concentration
